# Supplementary material for: fMRI functional connectivity of the periaqueductal gray in PTSD and its dissociative subtype
Source: PubMed Central journal article supplement (PMC5167004; doi:10.1002/brb3.579), 2016-09-20
Supplement: BRB3-6-e00579-s001.pdf [file BRB3-6-e00579-s001.pdf]

# Supplemental Results

**Supplemental Table 1 (see captions below)**

| Contrast                              | L/R | BA                      | Region                           | Cluster Size | p FWE  | Z-Score | MNI Coordinates |     |     |
|---------------------------------------|-----|-------------------------|----------------------------------|--------------|--------|---------|-----------------|-----|-----|
|                                       |     |                         |                                  |              |        |         | x               | y   | z   |
| <b>Group x ROI Interaction</b>        | R   | 6                       | Dorsal Anterior Cingulate Cortex | 231          | <0.001 | 4.81    | 12              | -6  | 44  |
|                                       | R   | 6                       | Supplemental Motor               |              |        | 4.34    | 4               | -10 | 54  |
|                                       | R   | 31                      | Mid-Cingulate Cortex             |              |        | 4.13    | 6               | -20 | 46  |
|                                       | L   | 6                       | Pre-central Gyrus                | 62           | 0.004  | 4.16    | -38             | 0   | 36  |
| <b>Main Effect of Group</b>           | L   | 6                       | Frontal Middle Gyrus             | 45514        | <0.001 | 7.24    | -26             | -6  | 52  |
|                                       | L   | 24                      | Mid-Cingulate Gyrus              |              |        | 6.32    | -4              | 16  | 36  |
|                                       | L   | 10                      | Frontal Middle Gyrus             | 50           | 0.014  | 4.27    | -40             | 56  | 2   |
|                                       | L   | 10                      | Orbitomedial Prefrontal Cortex   |              |        | 4.06    | -44             | 50  | -4  |
| <b>Main Effect of PAG Subdivision</b> | L   |                         | Cerebellar Lobules IV-V          | 915          | <0.001 | 65535   | -6              | -38 | -6  |
|                                       | R   | 23                      | Calcarine Sulcus                 | 55           | 0.016  | 5.60    | 4               | -56 | 12  |
|                                       | R   | 30                      | Calcarine Sulcus                 |              |        | 3.69    | 16              | -54 | 6   |
|                                       | R   | 24                      | Dorsal Anterior Cingulate        | 1703         | <0.001 | 5.26    | 10              | -20 | 44  |
|                                       | L   | 6                       | Supplemental Motor Area          |              |        | 5.09    | -4              | 8   | 48  |
|                                       | L   | 41                      | Heschl Gyrus                     |              |        | 5.08    | -38             | -26 | 14  |
|                                       | R   | 28                      | Hippocampus                      | 457          | <0.001 | 5.26    | 20              | -34 | 0   |
|                                       | R   | 35                      | Parahippocampal Gyrus            |              |        | 4.78    | 36              | -30 | -14 |
|                                       | R   | 13                      | Anterior Insula                  | 159          | <0.001 | 4.85    | 48              | 2   | 0   |
|                                       | R   | 22                      | Superior Temporal Pole           |              |        | 4.10    | 56              | 10  | -6  |
|                                       | R   | 8                       | Frontal Middle Gyrus             | 156          | <0.001 | 4.52    | 32              | 14  | 36  |
|                                       | R   | 9                       | Frontal Middle Gyrus             |              |        | 4.11    | 30              | 30  | 34  |
|                                       | R   | 44                      | Inferior Frontal Operculum       |              |        | 4.09    | 42              | 12  | 34  |
|                                       | R   | 32                      | Dorsal Anterior Cingulate        | 77           | 0.002  | 4.24    | 12              | 24  | 36  |
|                                       | R   | 8                       | Superior Frontal Gyrus           |              |        | 3.69    | 6               | 28  | 44  |
| R                                     | 22  | Superior Temporal Gyrus | 58                               | 0.012        | 4.21   | 50      | -28             | -2  |     |
| L                                     | 44  | Anterior Insula         | 65                               | 0.006        | 4.08   | -36     | 14              | 12  |     |
| R                                     | 44  | Middle Insula           | 69                               | 0.005        | 4.08   | 34      | 6               | 14  |     |

## Supplemental Figure 1

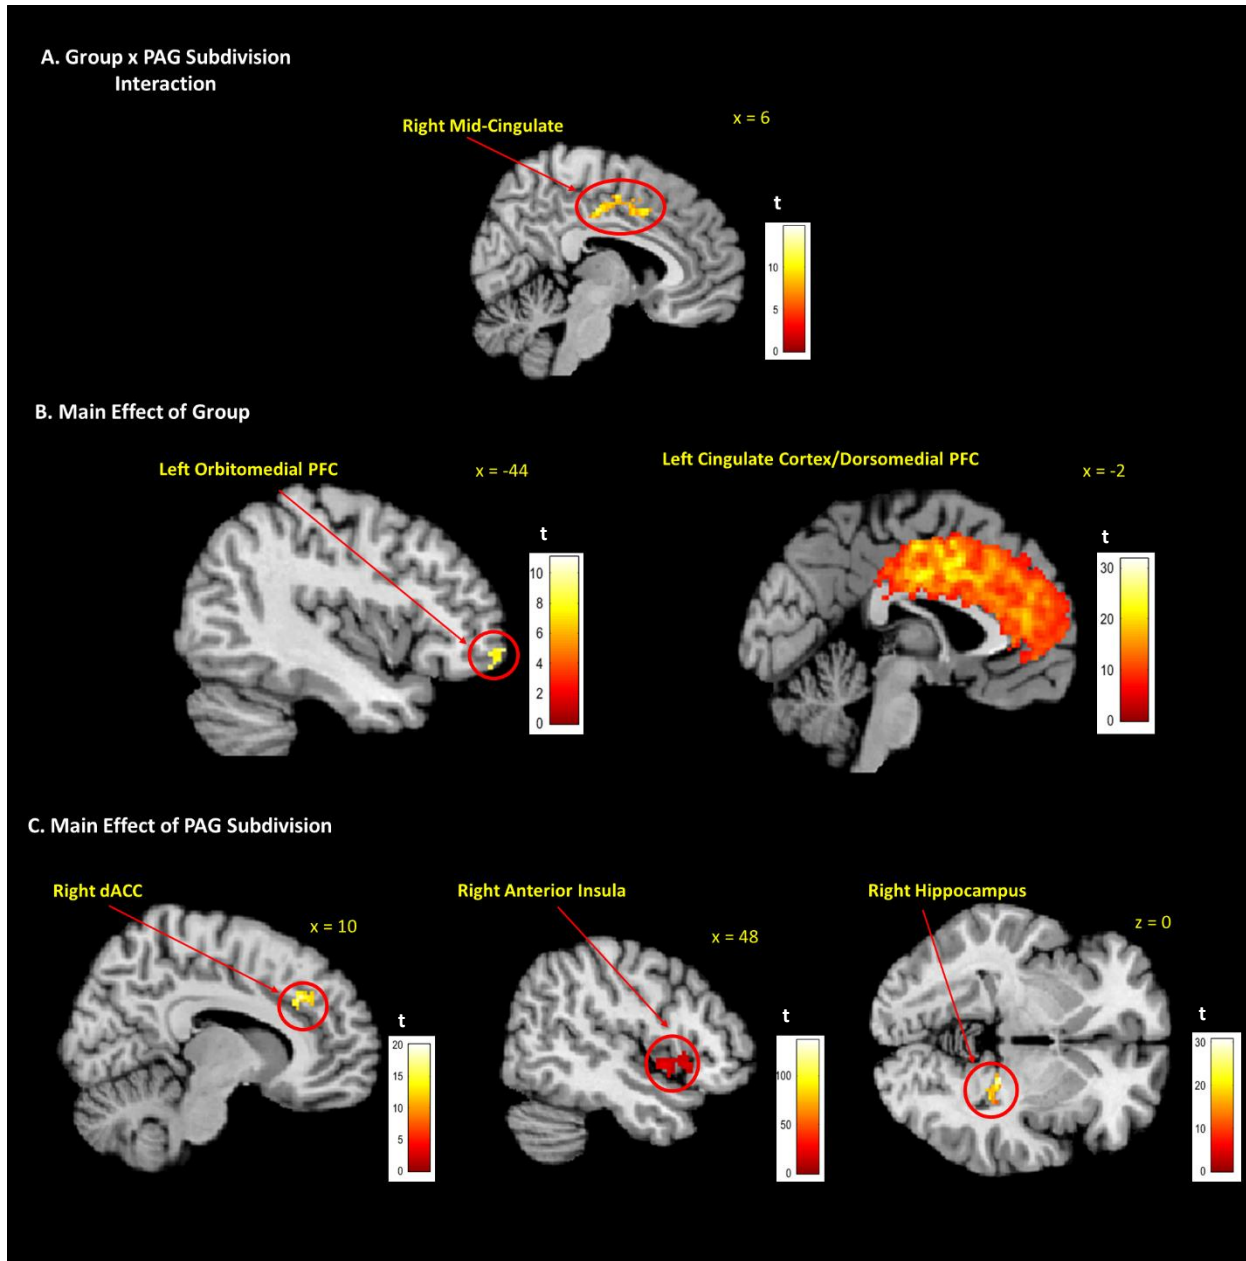

**Supplementary Table 2**

| Contrast                      | L/R | BA | Region                            | Cluster Size | p FWE  | Z-Score    | MNI Coordinates |     |     |
|-------------------------------|-----|----|-----------------------------------|--------------|--------|------------|-----------------|-----|-----|
|                               |     |    |                                   |              |        |            | x               | y   | z   |
| Within Control Group – DL-PAG | L   |    | Cerebellar Lobules IV-V           | 135          | <0.001 | <u>Inf</u> | -6              | -38 | -6  |
|                               | R   |    | Cerebellar Lobule III             |              |        | 4.66       | 8               | -40 | -8  |
|                               | L   |    | Cerebellar Vermis                 |              |        | 4.42       | 0               | -46 | -6  |
| Within Control Group – VL-PAG |     |    | No <u>suprathreshold</u> clusters |              |        |            |                 |     |     |
| Control DL>VL-PAG             | L   |    | Cerebellar Lobules IV-V           | 61           | 0.020  | 6.89       | -6              | -38 | -6  |
|                               | L   |    | Cerebellar Vermis                 |              |        | 3.89       | 0               | -50 | -10 |
| Control DL>VL-PAG             |     |    | No <u>suprathreshold</u> clusters |              |        |            |                 |     |     |
| Control>PTSD-DS DL-PAG        |     |    | No <u>suprathreshold</u> clusters |              |        |            |                 |     |     |
| Control>PTSD+DS DL-PAG        |     |    | No <u>suprathreshold</u> clusters |              |        |            |                 |     |     |
| Control>PTSD-DS VL-PAG        |     |    | No <u>suprathreshold</u> clusters |              |        |            |                 |     |     |
| Control>PTSD+DS VL-PAG        |     |    | No <u>suprathreshold</u> clusters |              |        |            |                 |     |     |

**Supplementary Table 3**

| Contrast                  | L/R | BA                             | Region                           | Cluster Size | p FWE  | Z-Score | MNI Coordinates |     |     |
|---------------------------|-----|--------------------------------|----------------------------------|--------------|--------|---------|-----------------|-----|-----|
|                           |     |                                |                                  |              |        |         | x               | y   | z   |
| PTSD-DS>Control<br>DL-PAG | L   | 44                             | Pre-central Gyrus                | 26318        | <0.001 | 6.43    | -58             | 8   | 24  |
|                           | R   | 13                             | Rolandic Operculum               |              |        | 6.08    | 40              | -8  | 18  |
|                           | L   | 24                             | Dorsal Anterior Cingulate Cortex |              |        | 5.88    | 0               | -10 | 38  |
|                           | R   | 54                             | Hippocampus                      | 234          | <0.001 | 6.04    | 24              | -36 | -2  |
|                           | R   |                                | Thalamic Pulvinar                |              |        | 4.00    | 20              | -32 | 12  |
|                           | R   |                                | Cerebellar Lobules IV-V          | 595          | <0.001 | 5.41    | 14              | -56 | -14 |
|                           | R   |                                | Cerebellar Vermis                |              |        | 4.75    | 4               | -52 | -6  |
|                           | L   |                                | Cerebellar Lobules IV-V          |              |        | 4.74    | -12             | -56 | -14 |
|                           | R   | 18                             | Calcarine Sulcus                 | 102          | <0.001 | 4.61    | 22              | -60 | 4   |
|                           | R   | 23                             | Calcarine Sulcus                 |              |        | 4.15    | 12              | -56 | 12  |
|                           | R   | 30                             | Lingual Gyrus                    |              |        | 3.84    | 8               | -62 | 4   |
|                           | R   | 40                             | Rolandic Operculum               | 70           | 0.011  | 4.54    | 48              | -20 | 16  |
|                           | R   | 41                             | Heschl Gyrus                     |              |        | 3.75    | 52              | -16 | 10  |
|                           | R   | 41                             | Superior Temporal Gyrus          |              |        | 3.40    | 50              | -30 | 12  |
|                           | L   | 21                             | Middle Temporal Gyrus            | 55           | 0.032  | 4.26    | -50             | 2   | -30 |
|                           | L   | 38                             | Middle Temporal Pole             |              |        | 3.46    | -40             | 8   | -30 |
| PTSD-DS>Control<br>VL-PAG | R   | 6                              | Mid-Cingulate Gyrus              | 18666        | <0.001 | 6.24    | -20             | 0   | 42  |
|                           | R   | 23                             | Mid-Cingulate Gyrus              |              |        | 5.67    | 2               | -18 | 34  |
|                           | R   | 6                              | Supplemental Motor               |              |        | 5.64    | 12              | 0   | 56  |
|                           | R   |                                | Cerebellar Lobule VI             | 55           | 0.032  | 5.57    | 18              | -64 | -18 |
|                           | L   | 18                             | Lingual Gyrus                    | 157          | <0.001 | 5.18    | -16             | -62 | 2   |
|                           | L   | 23                             | Precuneus                        |              |        | 4.36    | -4              | -54 | 18  |
|                           | L   | 23                             | Calcarine Sulcus                 |              |        | 3.69    | -12             | -58 | 10  |
|                           | R   | 54                             | Hippocampus                      | 134          | <0.001 | 4.71    | 32              | -36 | -8  |
|                           | R   | 18                             | Lingual Gyrus                    |              |        | 4.04    | 22              | -48 | 0   |
|                           | L   | 43                             | Rolandic Operculum               | 55           | 0.032  | 4.67    | -44             | -14 | 22  |
|                           | L   |                                | Cerebellar Vermis                | 104          | 0.001  | 4.47    | -2              | -58 | -10 |
|                           | L   |                                | Cerebellar Lobules IV-V          |              |        | 4.30    | -6              | -58 | -18 |
| L                         | 10  | Orbitomedial Prefrontal Cortex | 84                               | 0.004        | 4.06   | -40     | 48              | -10 |     |

**Supplementary Table 4**

| Contrast                  | L/R | BA | Region                                | Cluster Size | p FWE  | Z-Score | MNI Coordinates |     |     |
|---------------------------|-----|----|---------------------------------------|--------------|--------|---------|-----------------|-----|-----|
|                           |     |    |                                       |              |        |         | x               | y   | z   |
| PTSD+DS>Control<br>DL-PAG | L   | 6  | Pre-central Gyrus                     | 26486        | <0.001 | 6.09    | -28             | -12 | 48  |
|                           | L   | 24 | Frontal Middle Gyrus                  |              |        | 5.94    | -30             | 8   | 42  |
|                           | R   | 6  | Supplemental Motor                    |              |        | 5.85    | 10              | 4   | 52  |
|                           | R   | 10 | Frontal Middle                        | 110          | 0.001  | 4.06    | 32              | 58  | -2  |
|                           | R   | 11 | <u>Orbitomedial Prefrontal</u>        |              |        | 6.58    | 26              | 48  | -12 |
|                           | L   | 6  | Frontal Middle Gyrus                  | 23618        | <0.001 | 5.99    | -26             | -10 | 48  |
| PTSD+DS>Control<br>VL-PAG | R   | 6  | Dorsal Anterior Cingulate Cortex      |              |        | 5.35    | 14              | 28  | 42  |
|                           | R   | 21 | Middle Temporal Gyrus                 | 770          | <0.001 | 4.92    | 44              | -40 | -2  |
|                           | R   | 19 | Lingual Gyrus                         |              |        | 4.83    | 20              | -54 | -8  |
|                           | R   | 38 | Superior Temporal Pole                | 110          | 0.001  | 4.43    | 52              | 16  | -16 |
|                           | R   | 10 | Superior Orbitofrontal Gyrus          | 112          | 0.001  | 3.96    | 30              | 56  | -4  |
|                           | R   | 10 | <u>Orbitomedial Prefrontal Cortex</u> |              |        | 3.64    | 22              | 58  | -12 |

Supplemental Figure 2

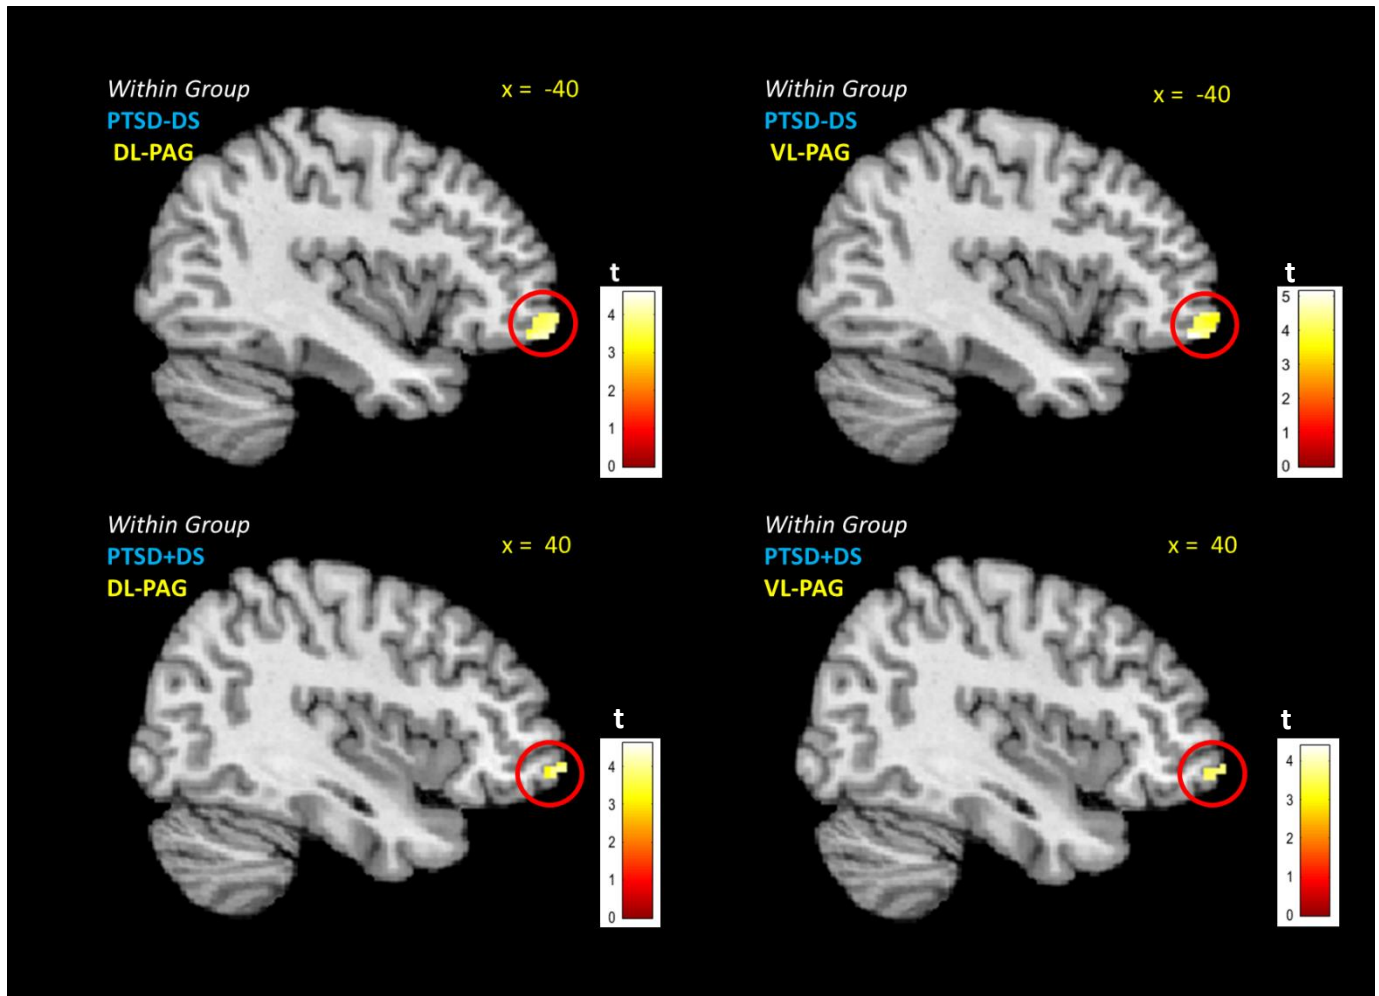

Supplemental Figure 3

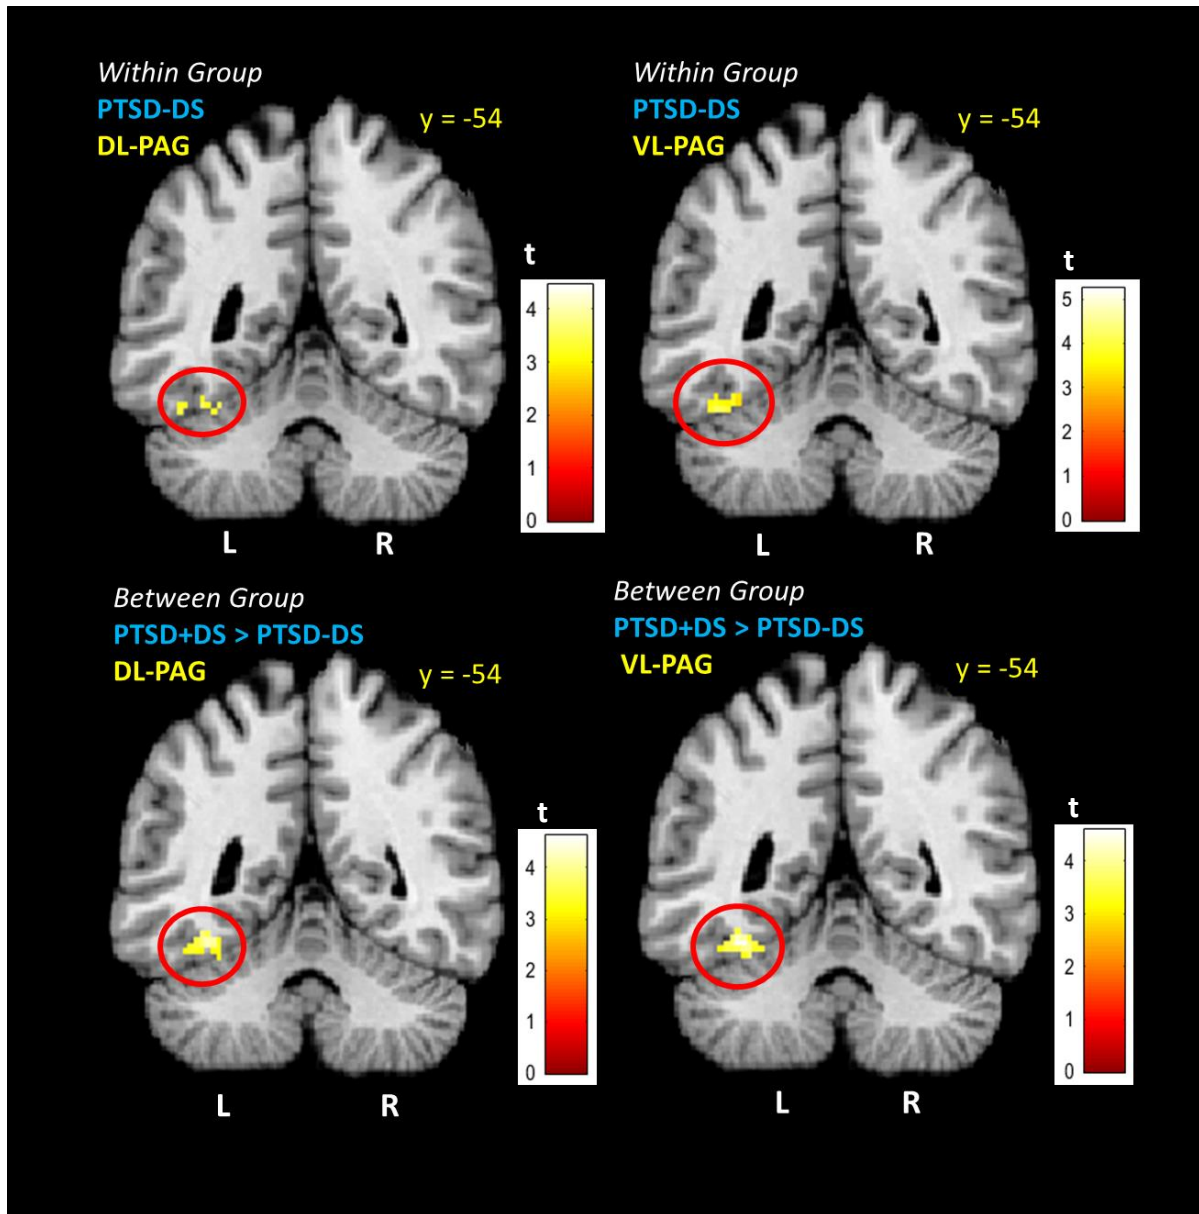



Supplemental Figure 4

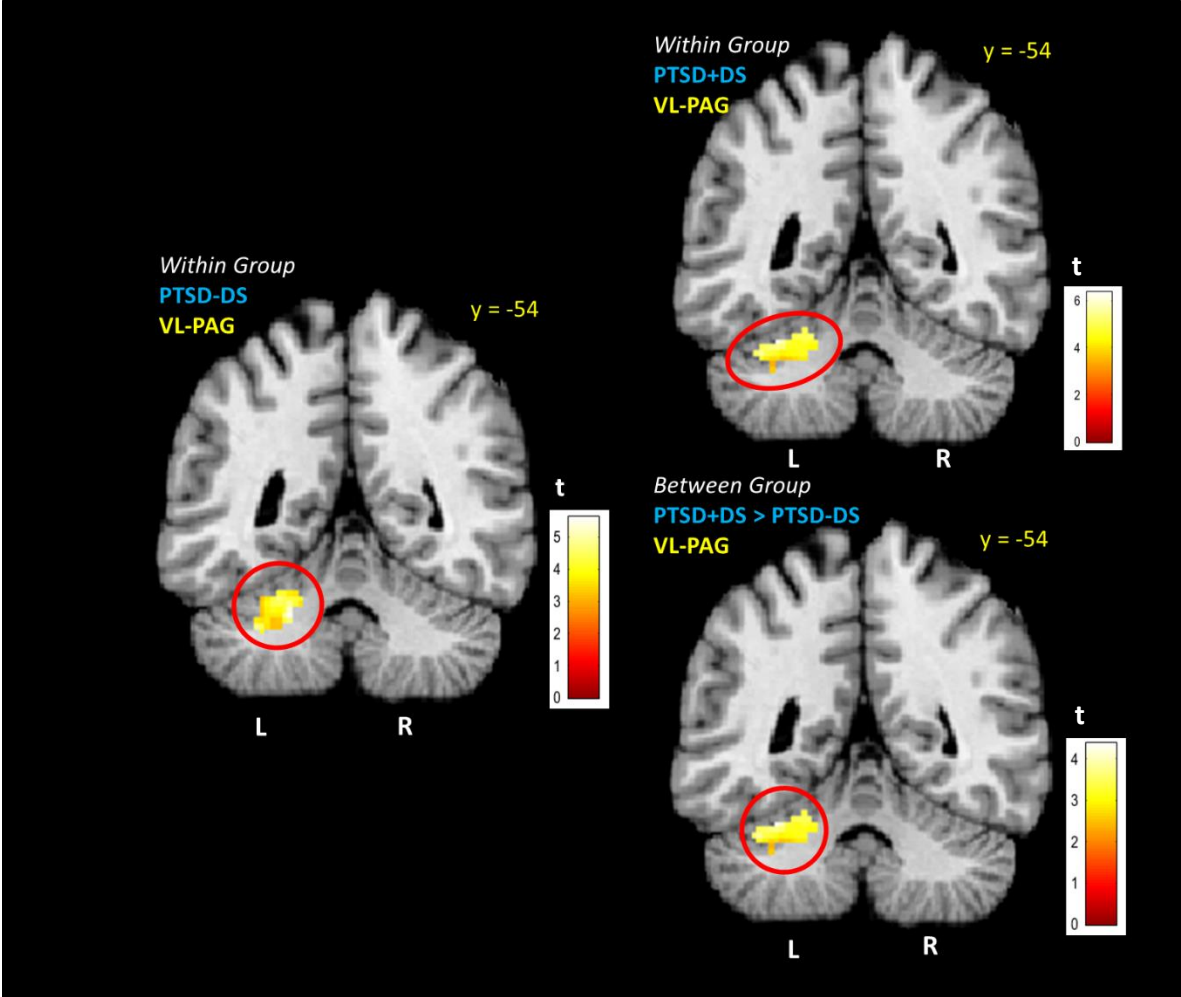

**Supplemental Table 1. 3 (Group) x 2 (PAG subdivision) Full Factorial ANOVA.** Areas revealed in the full-factorial interaction between group (Control, PTSD-DS, PTSD+DS) and PAG subdivision (DL- and VL-PAG), as well as the main effects for each factor. Abbreviations: L/R, left or right hemispheres; BA, Brodmann area. Full factorial analysis of variance displayed FWE whole brain corrected clusters at  $p < 0.05$ ,  $k = 50$ .

**Supplemental Figure 1. Brain areas revealed in the full-factorial analysis.** (A) The mid-cingulate gyrus was revealed in the interaction between participant group (control, PTSD-DS, PTSD+DS) and PAG subdivision (DL- and VL-PAG). (B) Brain areas for the main effect of group include the left orbitomedial prefrontal cortex (PFC) and widespread cingulate cortex/dorsolateral PFC connectivity (dorsal/ventral ACC, midcingulate). (C) The brain areas observed for the PAG subdivision main effect were concentrated largely in the right hemisphere, including the dACC, anterior insula and hippocampus. Anatomical labels were determined using AAL atlas. FWE whole brain cluster corrected at  $p < 0.05$ ,  $k = 50$ . Abbreviations: PTSD-DS, non-dissociative posttraumatic stress disorder patients; PTSD+DS, dissociative posttraumatic stress disorder patients; DL-PAG, dorsolateral periaqueductal gray; VL-PAG, ventrolateral periaqueductal gray.

**Supplementary Table 2. Post-hoc one-sample and two-sample t-tests of within- and between-group comparisons of healthy control participants to PTSD-DS and PTSD+DS patient groups.** Full factorial analysis of variance displayed FWE whole brain corrected clusters at  $p < 0.05$ ,  $k = 50$ . Abbreviations: PTSD-DS, non-dissociative posttraumatic stress disorder patients; PTSD+DS, dissociative posttraumatic stress disorder patients; DL-PAG, dorsolateral periaqueductal gray; VL-PAG, ventrolateral periaqueductal gray; L/R, left or right hemispheres; BA, Brodmann area.

**Supplementary Table 3.** Post-hoc two-sample t-tests that assess between-group comparisons of PTSD-DS to healthy controls.

Abbreviations: PTSD-DS, non-dissociative posttraumatic stress disorder patients; DL-PAG, dorsolateral periaqueductal gray; VL-PAG, ventrolateral periaqueductal gray; L/R, left or right hemispheres; BA, Brodmann area. FWE whole brain cluster corrected at  $p < 0.05$ ,  $k = 50$ .

**Supplementary Table 4.** Post-hoc two-sample t-tests that assess between-group comparisons of PTSD+DS to healthy controls.

Abbreviations: PTSD+DS, dissociative posttraumatic stress disorder patients; L/R, left or right hemispheres; BA, Brodmann area. FWE whole brain cluster corrected at  $p < 0.05$ ,  $k = 50$ .

**Supplemental Figure 2. Orbitomedial Prefrontal Cortex.** PTSD-DS and PTSD+DS patient groups demonstrated both DL- and VL-PAG functional connectivity with the orbitomedial prefrontal cortex (red circles) during resting state. FWE whole brain cluster corrected at  $p < 0.05$ ,  $k = 50$ .

Abbreviations: PTSD-DS, non-dissociative posttraumatic stress disorder patients; PTSD+DS, dissociative posttraumatic stress disorder patients; DL-PAG, dorsolateral periaqueductal gray; VL-PAG, ventrolateral periaqueductal gray.

**Supplemental Figure 3. Fusiform Gyrus.** Both PTSD-DS and PTSD+DS demonstrated both DL- and VL-PAG functional connectivity with the left fusiform gyrus (red circles) during resting state. PTSD-DS also demonstrated connectivity with the right fusiform gyrus (not shown). FWE whole brain cluster corrected at  $p < 0.05$ ,  $k = 50$ .

Abbreviations: PTSD-DS, non-dissociative posttraumatic stress disorder patients; PTSD+DS, dissociative posttraumatic stress disorder patients; DL-PAG, dorsolateral periaqueductal gray; VL-PAG, ventrolateral periaqueductal gray; L, left hemisphere; R, right hemisphere.

**Supplemental Figure 4. Cerebellar Lobule VI.** PTSD-DS demonstrated VL-PAG functional connectivity with cerebellar lobule VI (red circles), however PTSD+DS demonstrated both DL- and VL-PAG functional connectivity in the same area. PTSD+DS showed greater vIPAG functional connectivity with lobule VI when compared to PTSD-DS. Full factorial analysis of variance displayed FWE whole brain corrected clusters at  $p < 0.05$ ,  $k = 50$ .

Abbreviations: PTSD-DS, non-dissociative posttraumatic stress disorder patients; PTSD+DS, dissociative posttraumatic stress disorder patients; DL-PAG, dorsolateral periaqueductal gray; VL-PAG, ventrolateral periaqueductal gray; L, left hemisphere; R, right hemisphere.
